# Supplementary material for: Massively parallel genomic perturbations with multi-target CRISPR interrogates Cas9 activity and DNA repair at endogenous sites
Source: PubMed Central journal article supplement (PMC9481459; doi:10.1038/s41556-022-00975-z), 2022-09-05
Supplement: 41556_2022_975_MOESM1_ESM.pdf [file 41556_2022_975_MOESM1_ESM.pdf]

## Field-specific reporting

Please select the one below that is the best fit for your research. If you are not sure, read the appropriate sections before making your selection.

Life sciences  Behavioural & social sciences  Ecological, evolutionary & environmental sciences

For a reference copy of the document with all sections, see [nature.com/documents/nr-reporting-summary-flat.pdf](https://www.nature.com/documents/nr-reporting-summary-flat.pdf)

## Life sciences study design

All studies must disclose on these points even when the disclosure is negative.

|                 |                                                                                                                                                                                                                                                                |
|-----------------|----------------------------------------------------------------------------------------------------------------------------------------------------------------------------------------------------------------------------------------------------------------|
| Sample size     | No statistical method was used to predetermine sample size.                                                                                                                                                                                                    |
| Data exclusions | No data was excluded from the analysis                                                                                                                                                                                                                         |
| Replication     | Reproducibility was confirmed by computing Pearson correlation between replicates (when applied). This analysis is clearly stated and shown in the text, methods section, or supplementary materials. All experiments were performed in biological replicates. |
| Randomization   | The experiments were not randomized. This is not required for the current study because there is no participants involved in the experiments.                                                                                                                  |
| Blinding        | The Investigators were not blinded to allocation during experiments and outcome assessment. This is not relevant for this study because there is no participants involved in the experiments.                                                                  |

## Reporting for specific materials, systems and methods

We require information from authors about some types of materials, experimental systems and methods used in many studies. Here, indicate whether each material, system or method listed is relevant to your study. If you are not sure if a list item applies to your research, read the appropriate section before selecting a response.

### Materials & experimental systems

### Methods

| n/a                                 | Involved in the study                                     | n/a                                 | Involved in the study                           |
|-------------------------------------|-----------------------------------------------------------|-------------------------------------|-------------------------------------------------|
| <input type="checkbox"/>            | <input checked="" type="checkbox"/> Antibodies            | <input type="checkbox"/>            | <input checked="" type="checkbox"/> ChIP-seq    |
| <input type="checkbox"/>            | <input checked="" type="checkbox"/> Eukaryotic cell lines | <input checked="" type="checkbox"/> | <input type="checkbox"/> Flow cytometry         |
| <input checked="" type="checkbox"/> | <input type="checkbox"/> Palaeontology and archaeology    | <input checked="" type="checkbox"/> | <input type="checkbox"/> MRI-based neuroimaging |
| <input checked="" type="checkbox"/> | <input type="checkbox"/> Animals and other organisms      |                                     |                                                 |
| <input checked="" type="checkbox"/> | <input type="checkbox"/> Human research participants      |                                     |                                                 |
| <input checked="" type="checkbox"/> | <input type="checkbox"/> Clinical data                    |                                     |                                                 |
| <input checked="" type="checkbox"/> | <input type="checkbox"/> Dual use research of concern     |                                     |                                                 |

## Antibodies

|                 |                                                                                                                                                                                                                                                       |
|-----------------|-------------------------------------------------------------------------------------------------------------------------------------------------------------------------------------------------------------------------------------------------------|
| Antibodies used | Cas9 – Diagenode C15310258; MRE11 – Novus NB100-142; $\gamma$ H2AX – Abcam ab81299; 53BP1 – Novus NB100-305; Alexa647 Secondary antibody – Thermofisher, A-21235                                                                                      |
| Validation      | For all the antibodies used, there was a statement in the manufacturer's website indicating that they are suitable for immunoprecipitation assays. Also, we performed a no-treatment (negative) control for all the antibodies and cell lines tested. |

## Eukaryotic cell lines

Policy information about [cell lines](#)

|                                                                   |                                                                               |
|-------------------------------------------------------------------|-------------------------------------------------------------------------------|
| Cell line source(s)                                               | HEK293T (ATCC® CRL-3216™) and HeLa (ATCC® CCL-2™)                             |
| Authentication                                                    | The cell lines were not authenticated                                         |
| Mycoplasma contamination                                          | Cells were tested regularly for mycoplasma contamination and tested negative. |
| Commonly misidentified lines (See <a href="#">ICLAC</a> register) | None                                                                          |

## Data deposition

- Confirm that both raw and final processed data have been deposited in a public database such as [GEO](#).
- Confirm that you have deposited or provided access to graph files (e.g. BED files) for the called peaks.

|                                                                    |                                                                                                                         |
|--------------------------------------------------------------------|-------------------------------------------------------------------------------------------------------------------------|
| Data access links<br><i>May remain private before publication.</i> | <a href="https://www.ncbi.nlm.nih.gov/bioproject/PRJNA733683/">https://www.ncbi.nlm.nih.gov/bioproject/PRJNA733683/</a> |
| Files in database submission                                       | fastq files of all ChIP-Seq and ATAC-Seq experiments, including biological replicates                                   |
| Genome browser session<br>(e.g. <a href="#">UCSC</a> )             | <a href="https://www.ncbi.nlm.nih.gov/bioproject/PRJNA733683/">https://www.ncbi.nlm.nih.gov/bioproject/PRJNA733683/</a> |

## Methodology

|                         |                                                                                                                                                                                                                                                                                                                                                                    |
|-------------------------|--------------------------------------------------------------------------------------------------------------------------------------------------------------------------------------------------------------------------------------------------------------------------------------------------------------------------------------------------------------------|
| Replicates              | Two biological replicates.                                                                                                                                                                                                                                                                                                                                         |
| Sequencing depth        | Paired-end, 2x36 bp, 15 million paired-end reads per sample                                                                                                                                                                                                                                                                                                        |
| Antibodies              | Cas9 – Diagenode C15310258; MRE11 – Novus NB100-142; $\gamma$ H2AX – Abcam ab81299; 53BP1 – Novus NB100-305                                                                                                                                                                                                                                                        |
| Peak calling parameters | macs2 callpeak -t [path/to/sample] -c [path/to/negctrl] --outdir [path/to/output] --name [name/of/output] -f BAMPE -g hs<br>For each macs2 discovered peak with fold enrichment $\geq 4$ , a custom algorithm (publicly available on github, see above) attempts to identify the target sequence position for Cas9 binding or cleavage that best explains the peak |
| Data quality            | Reads were filtered for mapping quality $\geq 25$ . Singleton reads, potential PCR duplicates and index reads were removed.                                                                                                                                                                                                                                        |
| Software                | bowtie2, macs2, samtools<br>custom code available at <a href="https://github.com/rogerzou/multitargetCRISPR">https://github.com/rogerzou/multitargetCRISPR</a>                                                                                                                                                                                                     |
